# Supplementary material for: A structural view of synthetic cofactor integration into [FeFe]-hydrogenases
Source: Chem Sci. 2015 Oct 26;7(2):959–68. doi: 10.1039/c5sc03397g (PMC5954619; doi:10.1039/c5sc03397g)
Supplement: Supplementary file 1 [file SC-007-C5SC03397G-s001.pdf]

# A structural view of synthetic cofactor integration into [FeFe]-hydrogenases

Julian Esselborn<sup>a</sup>, Norifumi Muraki<sup>b</sup>, Kathrin Klein<sup>c</sup>, Vera Engelbrecht<sup>a</sup>, Nils Metzler-Nolte<sup>c</sup>, Ulf-Peter Apfel<sup>c</sup>, Eckhard Hofmann<sup>d</sup>, Genji Kurisu<sup>b\*</sup>, Thomas Happe<sup>a\*</sup>

**Table S1. RMSD of C $\alpha$  carbons of the reported structures in Å when superposed to the equivalent chain of Cpl<sup>ADT</sup> or native Cpl (3C8Y).**

|                      | Cpl <sup>ADT</sup> | native Cpl |
|----------------------|--------------------|------------|
| apoCpl A             | 0.46               | 0.23       |
| apoCpl B             | 0.4                | 0.32       |
| Cpl <sup>ADT</sup> A | -                  | 0.31       |
| Cpl <sup>ADT</sup> B | -                  | 0.29       |
| Cpl <sup>PDT</sup> A | 0.53               | 0.45       |
| Cpl <sup>PDT</sup> B | 0.42               | 0.36       |
| Cpl <sup>ODT</sup> A | 0.44               | 0.39       |
| Cpl <sup>ODT</sup> B | 0.39               | 0.3        |
| Cpl <sup>SDT</sup> A | 0.4                | 0.38       |
| Cpl <sup>SDT</sup> B | 0.42               | 0.33       |
| native Cpl           | 0.32               | 0.36       |

**Table S2. Conserved glycine residues, their relative position and their dihedral angles in apoHydA1 and apoCpl.**

| Residue   | RMSD [Å] | Degree of conservation <sup>a</sup> | apoHydA1              |             | apoCpl     |             |
|-----------|----------|-------------------------------------|-----------------------|-------------|------------|-------------|
|           |          |                                     | $\phi$ (°)            | $\psi$ (°)  | $\phi$ (°) | $\psi$ (°)  |
| G245/G412 | 15.5     | 90.80%                              | <b>86<sup>b</sup></b> | <b>-179</b> | -63        | -27         |
| G251/G418 | 14.8     | 87%                                 | <b>117</b>            | <b>-174</b> | -65        | -12         |
| G254/G421 | 7.2      | 99%                                 | 91                    | 2           | 96         | -6          |
| G255/G422 | 3.7      | 100%                                | <b>99</b>             | <b>163</b>  | -72        | -50         |
| G283/G450 | 16.0     | 83%                                 | 83                    | 9           | <b>92</b>  | <b>-176</b> |
| G286/G453 | 1.4      | 78%                                 | 69                    | 15          | -70        | -35         |

<sup>a</sup> According to a recent MSA from Winkler et al., 2013.

<sup>b</sup> Values in bold-face indicate angle-combinations only favorable for glycine according to Lovell et al., 2003.

**Tabel S3. Position of 2FeH subcluster within the active site cavity in different Cpl structures given as distances in Å and angles in °.**

| Atom 1                                | Atom 2        | native Cpl<br>(3C8Y) |         | apoCpl  |         | Cpl <sup>ADT</sup> |         | Cpl <sup>PDT</sup> |         | Cpl <sup>ODT</sup> |         | Cpl <sup>SDT</sup> |         |
|---------------------------------------|---------------|----------------------|---------|---------|---------|--------------------|---------|--------------------|---------|--------------------|---------|--------------------|---------|
|                                       |               | chain a              | chain b | chain a | chain b | chain a            | chain b | chain a            | chain b | chain a            | chain b | chain a            | chain b |
| 230 CA                                | 299 CA        | 12.1                 | 12.1    | 12.1    | 12.1    | 12.1               | 12.1    | 12.1               | 12.1    | 12.1               | 12.1    | 12.2               | 12.2    |
| 230 CA                                | 2FeH Fed      | 6.2                  |         |         |         | 6.2                | 6.1     | 6.0                | 6.0     | 6.1                | 6.1     | 6.2                | 6.1     |
| 299 CA                                | 2FeH Fed      | 6.1                  |         |         |         | 6.2                | 6.2     | 6.3                | 6.3     | 6.2                | 6.2     | 6.2                | 6.3     |
| 353 CA                                | 497 CA        | 14.6                 | 14.7    | 14.7    |         | 14.6               | 14.6    | 14.6               | 14.6    | 14.6               | 14.6    | 14.6               | 14.6    |
| 353 CA                                | 2FeH Fep      | 7.0                  |         |         |         | 7.0                | 7.0     | 6.9                | 6.9     | 7.0                | 6.9     | 6.9                | 7.0     |
| 497 CA                                | 2FeH Fep      | 8.9                  |         |         |         | 8.8                | 8.9     | 8.9                | 8.9     | 8.9                | 8.9     | 8.9                | 8.9     |
| 417 CA                                | 358 CA        | 14.8                 | 14.5    | 14.5    |         | 14.8               | 14.8    | 14.8               | 14.7    | 14.7               | 14.7    | 14.8               | 14.8    |
| 417 CA                                | 2FeH Fed      | 6.1                  |         |         |         | 6.1                | 6.1     | 6.2                | 6.1     | 6.0                | 6.0     | 6.1                | 6.1     |
| 358 CA                                | 2FeH Fed      | 9.0                  |         |         |         | 9.0                | 9.0     | 8.9                | 8.9     | 8.9                | 8.9     | 9.0                | 9.0     |
| 417 CA                                | 2FeH Fep      | 6.5                  |         |         |         | 6.5                | 6.5     | 6.5                | 6.5     | 6.4                | 6.4     | 6.5                | 6.5     |
| 358 CA                                | 2FeH Fep      | 8.5                  |         |         |         | 8.5                | 8.5     | 8.5                | 8.5     | 8.5                | 8.5     | 8.5                | 8.5     |
| 230 CB                                | 2FeH O5 (COb) | 3.0                  |         |         |         | 3.3                | 3.1     | 3.1                | 3.0     | 3.1                | 3.1     | 3.0                | 3.0     |
| 353 SD                                | 2FeH O5 (COb) | 3.2                  |         |         |         | 3.3                | 3.2     | 3.2                | 3.3     | 3.3                | 3.3     | 3.2                | 3.2     |
| Dihedral C(COb) - Fed - Fep - O (COb) |               | -3                   |         |         |         | -1                 | 0       | -1                 | -1      | -1                 | 0       | 0                  | -1      |
| Dihedral C(COb) - S1 - S2 - O (COb)   |               | -2                   |         |         |         | -7                 | -2      | -6                 | -6      | -3                 | -6      | 3                  | 2       |

**Table S4. Distances between parts of the 2FeH cluster and potential interaction partners in the protein in Å.**

|     | Cpl native<br>(3C8Y) |     | Cpl <sup>ADT</sup> |         | Cpl <sup>PDT</sup> |         | Cpl <sup>ODT</sup> |         | Cpl <sup>SDT</sup> |         |
|-----|----------------------|-----|--------------------|---------|--------------------|---------|--------------------|---------|--------------------|---------|
|     |                      |     | chain a            | chain b |
| adt | C299 SG              | 3.5 | 3.5                | 3.5     | 3.5                | 3.6     | 3.4                | 3.4     | 3.5                | 3.5     |
|     | C299 CA              | 5.0 | 4.8                | 4.9     | 4.7                | 4.8     | 4.8                | 4.8     | 4.7                | 4.8     |
|     | M497 SD              | 3.6 | 3.7                | 3.7     | 3.9                | 3.9     | 3.9                | 3.9     | 4.0                | 3.9     |
| CND | S323 OG              | 3.8 | 3.9                | 3.8     | 3.9                | 3.8     | 3.9                | 3.8     | 3.9                | 3.9     |
|     | P324 N               | 3.5 | 3.5                | 3.5     | 3.6                | 3.4     | 3.6                | 3.5     | 3.5                | 3.4     |
|     | Q325 N               | 2.9 | 2.9                | 2.9     | 3.0                | 2.9     | 2.9                | 2.9     | 2.9                | 2.9     |
|     | K358 NZ              | 2.9 | 2.8                | 2.8     | 2.8                | 2.8     | 2.8                | 2.9     | 2.9                | 3.0     |
| CNP | P231 N               | 3.6 | 3.6                | 3.6     | 3.6                | 3.6     | 3.6                | 3.6     | 3.6                | 3.6     |
|     | S232 N               | 3.1 | 3.1                | 3.1     | 3.0                | 3.1     | 3.1                | 3.1     | 3.1                | 3.1     |
|     | OG                   | 2.8 | 2.8                | 2.8     | 2.9                | 2.9     | 2.9                | 2.9     | 2.8                | 2.8     |
| COB | M353 SD              | 3.2 | 3.3                | 3.2     | 3.2                | 3.3     | 3.3                | 3.3     | 3.2                | 3.2     |
| COP | M353 SD              | 3.5 | 3.5                | 3.5     | 3.6                | 3.5     | 3.6                | 3.5     | 3.8                | 3.7     |
| S1  | F417 O               | 3.4 | 3.5                | 3.5     | 3.5                | 3.6     | 3.5                | 3.5     | 3.5                | 3.6     |

Table S5: Distances, angles and dihedral angles of [2Fe2S]-clusters in comparison.

| Distances [Å]     | CpI <sup>ADT</sup> |         | CpI <sup>ROT</sup> |         | CpI <sup>ORT</sup> |         | CpI <sup>SOT</sup> |         | native Cpl<br>(3CBY) | DdH<br>(1HFE) | EXAFS of<br>2Fe <sub>2</sub> S of<br>HydA1 <sup>a</sup> |                                               | Calculated <sup>b</sup><br>CpI <sup>ADT</sup> | Calculated <sup>b</sup><br>CpI <sup>ROT</sup> | Calculated <sup>b</sup><br>CpI <sup>ORT</sup> | [2Fe2S]-adt<br>complex<br>alone <sup>c</sup> | [2Fe2S]-odt-<br>monocarbonyl<br>complex<br>alone <sup>d</sup> | [2Fe2S]-sdt-<br>hexacarbonyl<br>complex<br>alone <sup>e</sup> | [2Fe2S]-pdt-<br>dicarbonyl<br>complex<br>alone <sup>f</sup> |
|-------------------|--------------------|---------|--------------------|---------|--------------------|---------|--------------------|---------|----------------------|---------------|---------------------------------------------------------|-----------------------------------------------|-----------------------------------------------|-----------------------------------------------|-----------------------------------------------|----------------------------------------------|---------------------------------------------------------------|---------------------------------------------------------------|-------------------------------------------------------------|
|                   | chain a            | chain b |                      |               | 2Fe <sub>2</sub> S of<br>HydA1 <sup>a</sup>             | Calculated <sup>b</sup><br>CpI <sup>ADT</sup> |                                               |                                               |                                               |                                              |                                                               |                                                               |                                                             |
| Fe <sub>2</sub> P | S1                 | 2.3     | 2.3                | 2.3     | 2.3                | 2.3     | 2.4                | 2.4     | 2.3                  | 2.3           | 2.22                                                    | 2.42                                          | 2.41                                          | 2.38                                          | 2.43                                          | 2.28                                         | 2.24                                                          | 2.28                                                          |                                                             |
| Fe <sub>2</sub> P | S2                 | 2.3     | 2.3                | 2.3     | 2.4                | 2.3     | 2.3                | 2.3     | 2.3                  | 2.3           | 2.22                                                    | 2.41                                          | 2.38                                          | 2.39                                          | 2.39                                          | 2.29                                         | 2.25                                                          | 2.28                                                          |                                                             |
| Fe <sub>2</sub> P | S1                 | 2.3     | 2.3                | 2.3     | 2.3                | 2.3     | 2.3                | 2.4     | 2.3                  | 2.3           | 2.22                                                    | 2.34                                          | 2.33                                          | 2.37                                          | 2.37                                          | 2.28                                         | 2.27                                                          | 2.26                                                          |                                                             |
| Fe <sub>2</sub> P | S2                 | 2.4     | 2.3                | 2.2     | 2.3                | 2.3     | 2.3                | 2.3     | 2.3                  | 2.3           | 2.22                                                    | 2.31                                          | 2.33                                          | 2.38                                          | 2.29                                          | 2.29                                         | 2.26                                                          | 2.27                                                          |                                                             |
| Fe <sub>2</sub> P | Fe <sub>2</sub> d  | 2.6     | 2.6                | 2.5     | 2.5                | 2.6     | 2.5                | 2.6     | 2.6                  | 2.6           | 2.56                                                    | 2.53                                          | 2.53                                          | 2.53                                          | 2.51                                          | 2.51                                         | 2.52                                                          | 2.52                                                          |                                                             |
| S1                | C <sub>adt1</sub>  | 1.9     | 1.9                | 1.9     | 1.9                | 1.9     | 1.9                | 1.9     | 1.9                  | 1.8           |                                                         | 1.88                                          | 1.90                                          | 1.91                                          | 1.87                                          | 1.83                                         | 1.83                                                          | 1.83                                                          |                                                             |
| S2                | C <sub>adt2</sub>  | 1.9     | 1.9                | 1.9     | 1.9                | 1.9     | 1.9                | 1.9     | 1.9                  | 1.8           |                                                         | 1.88                                          | 1.91                                          | 1.91                                          | 1.86                                          | 1.84                                         | 1.82                                                          | 1.82                                                          |                                                             |
| C <sub>adt1</sub> | N <sub>adt</sub>   | 1.5     | 1.5                | 1.5     | 1.5                | 1.5     | 1.5                | 1.5     | 1.5                  | 1.5           | 1.5                                                     | 1.51                                          | 1.51                                          | 1.48                                          | 1.43                                          | 1.42                                         | 1.73                                                          | 1.54                                                          |                                                             |
| C <sub>adt2</sub> | N <sub>adt</sub>   | 1.5     | 1.5                | 1.5     | 1.5                | 1.5     | 1.5                | 1.5     | 1.5                  | 1.5           | 1.5                                                     | 1.51                                          | 1.52                                          | 1.47                                          | 1.39                                          | 1.40                                         | 1.75                                                          | 1.51                                                          |                                                             |
| Fe <sub>2</sub> P | C <sub>cop</sub>   | 1.7     | 1.7                | 1.7     | 1.7                | 1.7     | 1.7                | 1.7     | 1.7                  | 1.7           | 1.84                                                    | 1.67                                          | 1.67                                          | 1.67                                          | 1.76                                          | 1.76                                         | 1.76                                                          | 1.73                                                          |                                                             |
| Fe <sub>2</sub> P | C <sub>cnp</sub>   | 1.8     | 1.8                | 1.8     | 1.8                | 1.8     | 1.9                | 1.8     | 1.8                  | 1.8           | 1.84                                                    | 1.76                                          | 1.76                                          | 1.76                                          | 1.94                                          | 1.92                                         |                                                               | 1.93                                                          |                                                             |
| Fe <sub>2</sub> P | C <sub>cob</sub>   | 1.9     | 1.9                | 1.9     | 1.9                | 1.9     | 2.0                | 1.9     | 1.9                  | 2.0           | 1.84                                                    | 2.00                                          | 2.00                                          | 2.00                                          | 1.74                                          |                                              |                                                               |                                                               |                                                             |
| Fe <sub>2</sub> P | C <sub>cnd</sub>   | 1.9     | 1.9                | 1.9     | 1.9                | 1.9     | 1.9                | 1.9     | 1.9                  | 1.9           | 1.84                                                    | 1.99                                          | 1.99                                          | 1.99                                          | 1.94                                          |                                              |                                                               | 1.93                                                          |                                                             |
| Fe <sub>2</sub> P | C <sub>cob</sub>   | 1.8     | 1.7                | 1.8     | 1.8                | 1.8     | 1.8                | 1.8     | 1.8                  | 1.8           | 1.84                                                    | 1.82                                          | 1.82                                          | 1.82                                          | 1.75                                          | 1.77                                         | 1.80                                                          | 1.74                                                          |                                                             |
| Fe <sub>2</sub> P | C <sub>cob</sub>   | 1.9     | 1.9                | 1.9     | 1.9                | 1.9     | 1.8                | 2.1     | 1.9                  | 1.9           | 1.84                                                    | 2.00                                          | 2.00                                          | 2.00                                          | 3.36                                          |                                              |                                                               |                                                               |                                                             |
| C <sub>cop</sub>  | O <sub>cop</sub>   | 1.2     | 1.3                | 1.2     | 1.2                | 1.2     | 1.2                | 1.2     | 1.2                  | 1.2           | 1.1                                                     | 1.16                                          | 1.21                                          | 1.21                                          | 1.16                                          | 1.15                                         | 1.15                                                          | 1.18                                                          |                                                             |
| C <sub>cnp</sub>  | N <sub>cnp</sub>   | 1.2     | 1.2                | 1.2     | 1.2                | 1.2     | 1.2                | 1.2     | 1.2                  | 1.2           | 1.1                                                     | 1.20                                          | 1.20                                          | 1.20                                          | 1.15                                          | 1.15                                         |                                                               | 1.16                                                          |                                                             |
| C <sub>cob</sub>  | O <sub>cob</sub>   | 1.2     | 1.2                | 1.2     | 1.2                | 1.2     | 1.2                | 1.2     | 1.2                  | 1.2           | 1.1                                                     | 1.19                                          | 1.19                                          | 1.19                                          | 1.15                                          |                                              |                                                               | 1.15                                                          |                                                             |
| C <sub>cnd</sub>  | N <sub>cnd</sub>   | 1.1     | 1.1                | 1.1     | 1.1                | 1.1     | 1.1                | 1.1     | 1.1                  | 1.1           | 1.1                                                     | 1.13                                          | 1.13                                          | 1.13                                          | 1.15                                          | 1.14                                         | 1.14                                                          | 1.15                                                          |                                                             |
| C <sub>cnd</sub>  | O <sub>cnd</sub>   | 1.2     | 1.2                | 1.2     | 1.1                | 1.2     | 1.2                | 1.2     | 1.2                  | 1.2           | 1.1                                                     | 1.17                                          | 1.17                                          | 1.17                                          | 1.15                                          |                                              |                                                               | 1.17                                                          |                                                             |
| Fe <sub>2</sub> d | N <sub>adt</sub>   | 3.4     | 3.4                | 3.4     | 3.4                | 3.3     | 3.3                | 3.3     | 3.3                  | 3.4           | 3.4                                                     | 3.52                                          | 3.44                                          | 3.42                                          | 3.42                                          | 3.54                                         | 3.27                                                          | 3.46                                                          |                                                             |
| C <sub>adt1</sub> | C <sub>adt2</sub>  | 2.5     | 2.6                | 2.5     | 2.5                | 2.5     | 2.6                | 2.3     | 2.5                  | 2.5           |                                                         | 2.60                                          | 2.58                                          | 2.48                                          | 2.44                                          | 2.34                                         | 2.70                                                          | 2.52                                                          |                                                             |
| S1                | S2                 | 3.2     | 3.1                | 3.2     | 3.2                | 3.1     | 3.1                | 3.2     | 3.1                  | 3.1           |                                                         | 3.31                                          | 3.32                                          | 3.35                                          | 3.10                                          | 3.04                                         | 3.09                                                          | 3.09                                                          |                                                             |

| Angles            |  | S1                | S2  | S1                | S2   | S1   | S2   | S1   | S2   | S1   | S2   | S1    | S2    | S1    | S2    | S1    | S2     | S1     | S2 |
|-------------------|--|-------------------|-----|-------------------|------|------|------|------|------|------|------|-------|-------|-------|-------|-------|--------|--------|----|
| Fe <sub>2</sub> P |  | 86                | 85  | 88                | 86   | 85   | 84   | 88   | 87   | 87   | 82   | 86.4  | 87.5  | 87.9  | 85.5  |       |        |        |    |
| C <sub>adt1</sub> |  | 110               | 111 | 124               | 119  | 106  | 107  | 127  | 125  | 117  | 99   | 112.5 | 112.1 | 112.8 | 117.2 |       |        |        |    |
| C <sub>cop</sub>  |  | 169               | 171 | 170               | 171  | 170  | 171  | 168  | 169  | 170  | 177  | 166.3 | 166.3 | 166.3 | 177.5 |       |        |        |    |
| C <sub>cnp</sub>  |  | 177               | 175 | 169               | 170  | 179  | 178  | 178  | 174  | 179  | 179  | 169.8 | 169.8 | 169.8 | 179.4 |       |        |        |    |
| C <sub>cnd</sub>  |  | 172               | 173 | 171               | 170  | 172  | 173  | 171  | 166  | 172  | 177  | 169.0 | 169.0 | 169.0 | 179.5 |       |        |        |    |
| Fe <sub>2</sub> d |  | 170               | 176 | 174               | 171  | 173  | 175  | 174  | 174  | 175  | 180  | 167.3 | 167.3 | 167.3 | 177.9 |       |        |        |    |
| S1                |  | 174               | 174 | 171               | 173  | 171  | 169  | 171  | 170  | 174  | 176  | 170.6 | 171.0 | 172.0 | 158.3 |       |        |        |    |
| S1                |  | Fe <sub>2</sub> P | 86  | 88                | 87   | 86   | 89   | 84   | 87   | 87   | 81   | 83.3  | 84.1  | 84.6  | 100.8 |       |        |        |    |
| S1                |  | Fe <sub>2</sub> d | 87  | 91                | 88   | 88   | 90   | 89   | 94   | 91   | 88   | 92.5  | 93.0  | 93.7  | 158.6 |       |        |        |    |
| S1                |  | Fe <sub>2</sub> d | 172 | 173               | 173  | 170  | 172  | 172  | 172  | 171  | 174  | 179.8 | 178.9 | 178.0 | 100.7 |       |        |        |    |
| S1                |  | Fe <sub>2</sub> d | 93  | 89                | 89   | 86   | 89   | 92   | 91   | 91   | 92   | 88.5  | 89.2  | 89.9  | 88.0  |       |        |        |    |
| Fe <sub>2</sub> d |  | C <sub>cop</sub>  | 155 | 144               | 159  | 155  | 147  | 155  | 132  | 145  |      | 140.0 | 140.0 | 140.0 |       |       |        |        |    |
| Fe <sub>2</sub> d |  | C <sub>cob</sub>  | 144 | 132               | 119  | 121  | 128  | 121  | 145  | 132  |      | 140.9 | 140.9 | 140.9 |       |       |        |        |    |
| Dihedrals         |  | Fe <sub>2</sub> P | S1  | C <sub>adt1</sub> | -103 | -104 | -108 | -105 | -107 | -111 | -110 | -110  | -107  | -103  | -94.8 | -97.9 | -100.2 | -106.1 |    |
| Fe <sub>2</sub> P |  | Fe <sub>2</sub> d | S2  | C <sub>adt2</sub> | 103  | 105  | 107  | 101  | 99   | 106  | 103  | 104   | 105   | 105   | 94.0  | 97.0  | 97.1   | 102.8  |    |
| Fe <sub>2</sub> P |  | S1                | S2  | C <sub>cop</sub>  | -5   | -4   | -5   | -3   | -5   | -6   | -6   | -4    | -4    | -6    | -5.3  | -5.1  | -4.5   | -12.7  |    |
| Fe <sub>2</sub> P |  | S1                | S2  | C <sub>cnp</sub>  | -5   | -6   | -3   | -5   | -6   | -6   | -5   | -7    | -4    | -6    | -5.1  | -4.9  | 41.3   |        |    |
| Fe <sub>2</sub> P |  | S1                | S2  | C <sub>cob</sub>  | 51   | 48   | 50   | 50   | 47   | 50   | 45   | 47    | 51    | 3     | 48.1  | 48.7  | 12.4   |        |    |
| Fe <sub>2</sub> d |  | S1                | S2  | C <sub>cnd</sub>  | -2   | -3   | -2   | -3   | -2   | -3   | 0    | 1     | 2     | 3     | -0.1  | -0.4  | -0.8   | -40.2  |    |
| Fe <sub>2</sub> d |  | S1                | S2  | C <sub>cnd</sub>  | -2   | -3   | -3   | -3   | -3   | -3   | -1   | -1    | 1     | -3    | -2.6  | -1.5  | -1.4   | 13.1   |    |

<sup>a</sup> Lambert et al., 2014.

<sup>b</sup> Pandey et al., 2008.

<sup>c</sup> U and auchfluss 2002.

<sup>d</sup> Song et al., 2004

<sup>e</sup> Song et al., 2007

<sup>f</sup> Schmidt et al., 1999

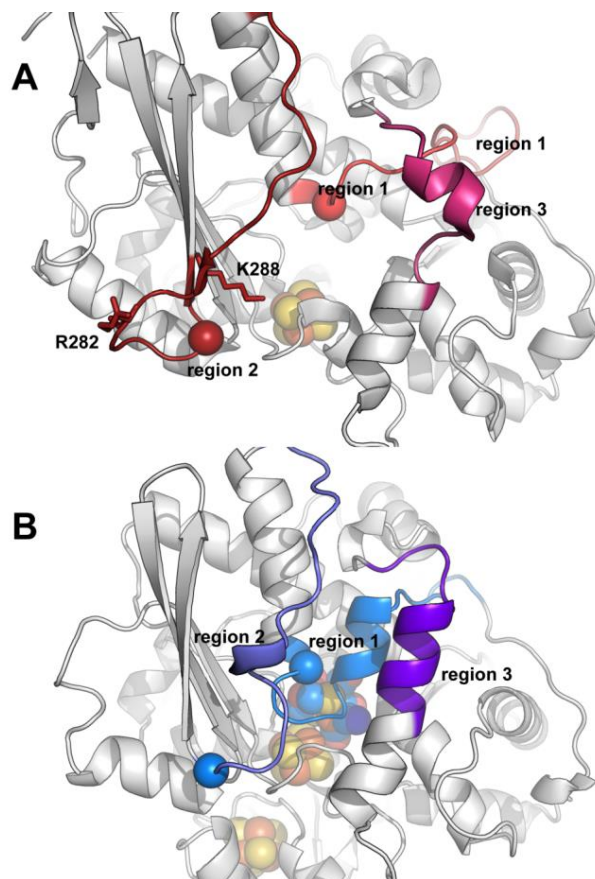

Figure S1: Presumed maturation channel in apoHydA1 and Cpl<sup>MIM</sup>. (A) View along the presumed maturation channel of a cartoon representation of apoHydA1 (PDB ID 3LX4). Regions with high RMSD in comparison to Cpl are marked in red tones and labeled as mentioned in the text (region 1: 238-256; region 2: 270-288; region 3: 402-413; numbering of 3LX4). Conserved cationic amino acids R282/449 and K288/455 are shown in stick representation (numbering as in 3LX4/3C8Y). (B) Cartoon representation of Cpl<sup>MIM</sup> in the same orientation as apoHydA1 in A with regions of difference marked with blue hues (region 1: 405-423; region 2: 437-453; region 3: 529-540; numbering as in 3C8Y). Potential glycine hinges G255/422 and G286/453 and FeS clusters are shown as spheres in A and B.

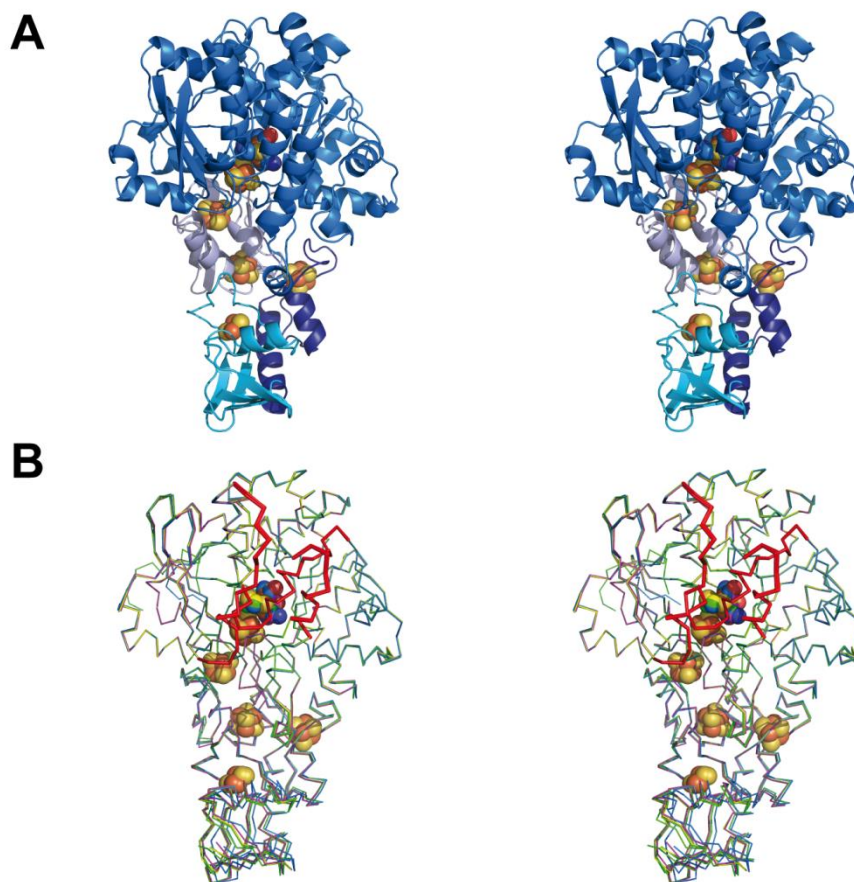

**Figure S2: Stereo view of Figure 1: Structures of unmaturred and semisynthetic [FeFe]-hydrogenases.**

(A) Cartoon model of [FeFe]-hydrogenase Cpl<sup>ADT</sup> with domains in different hues of blue. (B) Overlay of ribbon models of [FeFe]-hydrogenases apoCpl (cyan), Cpl<sup>ADT</sup> (marine), Cpl<sup>PDT</sup> (magenta), Cpl<sup>ODT</sup> (green) and Cpl<sup>SDT</sup> (yellow). H-domain regions significantly different to apoHydA1 indicated as thicker ribbon and in red in B. FeS cluster atoms depicted as spheres and colored according to element (Fe=brown, S=beige, O=red, N=blue, C in color of respective protein) in A and B.

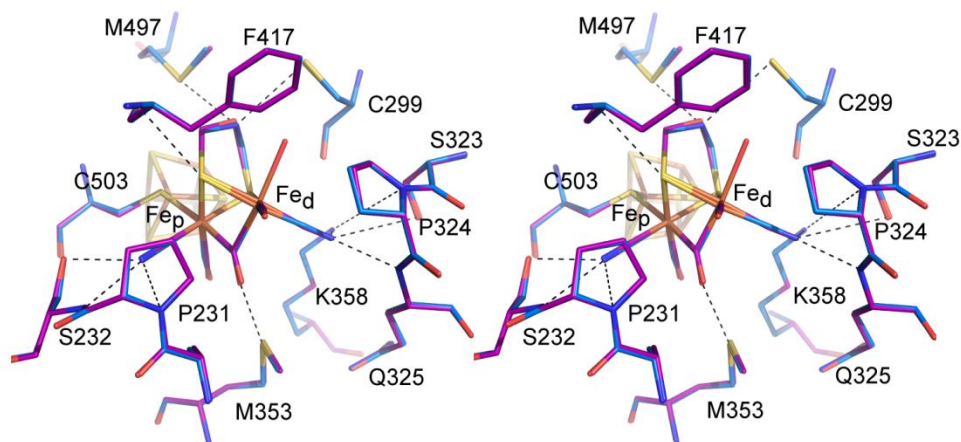

**Figure S3: Stereo view of Figure 3: Comparison of the active site of Cpl<sup>ADT</sup> and native Cpl.** Stick model of the environment of the 2Fe<sub>H</sub>-subcluster of Cpl<sup>ADT</sup> (carbon atoms in marine) superposed to a stick model of native Cpl (PDB ID 3C8Y) (carbon atoms in magenta). Dashed lines indicate potential interactions between 2Fe<sub>H</sub> and the protein listed in table S4. Numbering of amino acids as in the structure of native Cpl.

**A**

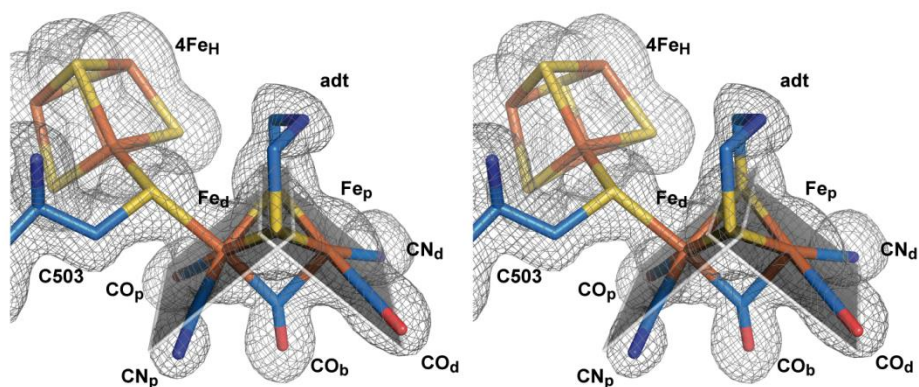

**B**

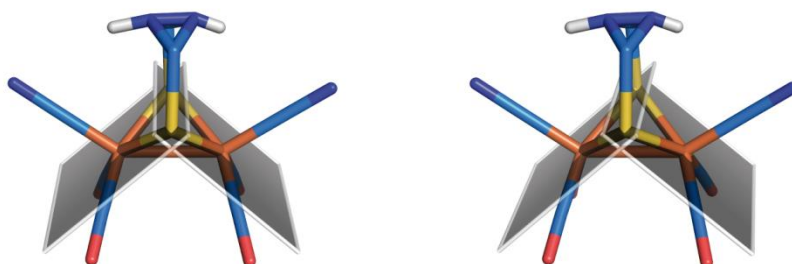

**Figure S4: Stereo view of Figure 4: Structure of semisynthetic H-cluster and structural changes in ligand coordination upon integration of 2Fe<sub>H</sub>.** (A) Stick model of the H-cluster of Cpl<sup>ADT</sup> colored according to element with F<sub>o</sub>-F<sub>c</sub> simulated annealing omit map contoured at 3.5σ. (B) Stick model of the crystal structure of Fe<sub>2</sub>[μ-(SCH<sub>2</sub>)<sub>2</sub>NH](CN)<sub>2</sub>(CO)<sub>4</sub><sup>2-</sup>. The planes in A and B are drawn through the sulfur atoms of the [2Fe] complexes and one of the two Fe atoms each to clarify the coordination geometry of the Fe ligands.

**A**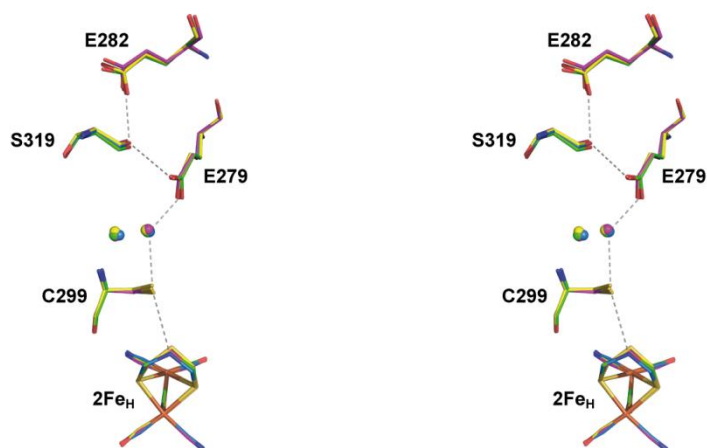**B**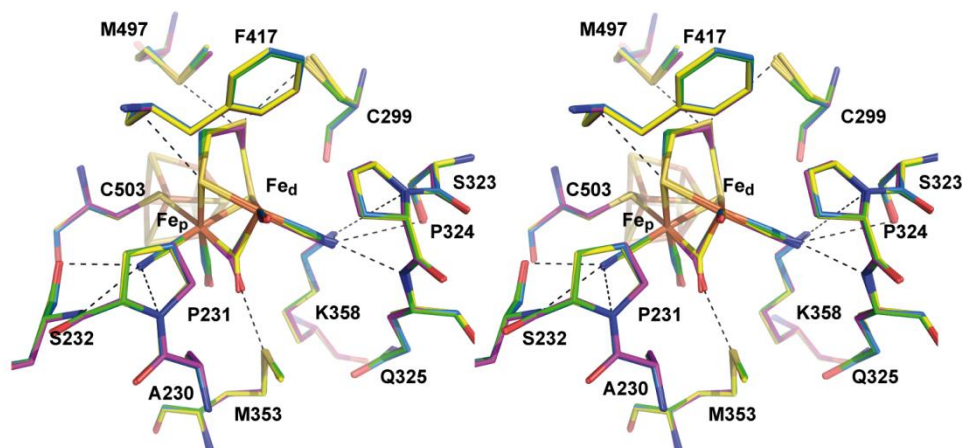

**Figure S5: Stereo view of Figure 5: Comparison of the catalytically important amino acids in Cpl derivatives.** Stick models of the potential proton transfer pathway (A) and the environment of the  $2\text{Fe}_\text{H}$ -subcluster (B) of  $\text{Cpl}^{\text{ADT}}$  (carbon atoms in marine) superposed to stick models of  $\text{Cpl}^{\text{PDT}}$  (magenta),  $\text{Cpl}^{\text{ODT}}$  (green) and  $\text{Cpl}^{\text{SDT}}$  (yellow). Dashed lines indicate potential proton transfer interactions or potential interactions of  $2\text{Fe}_\text{H}$  with the protein as listed in table S4. Numbering of amino acids as in the structure of native Cpl.

**A**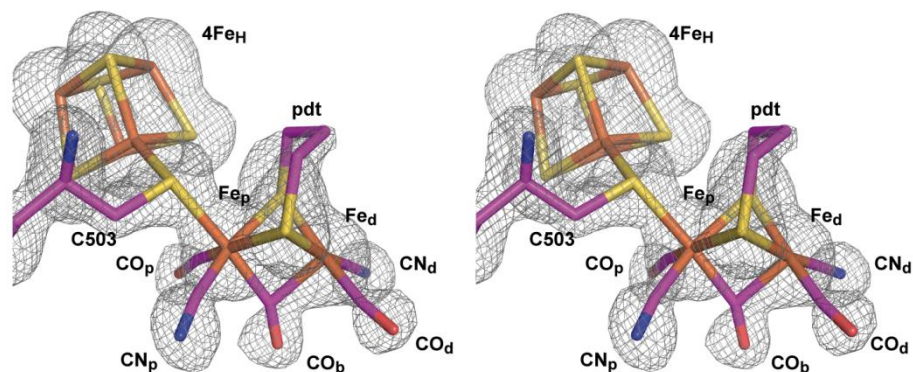**B**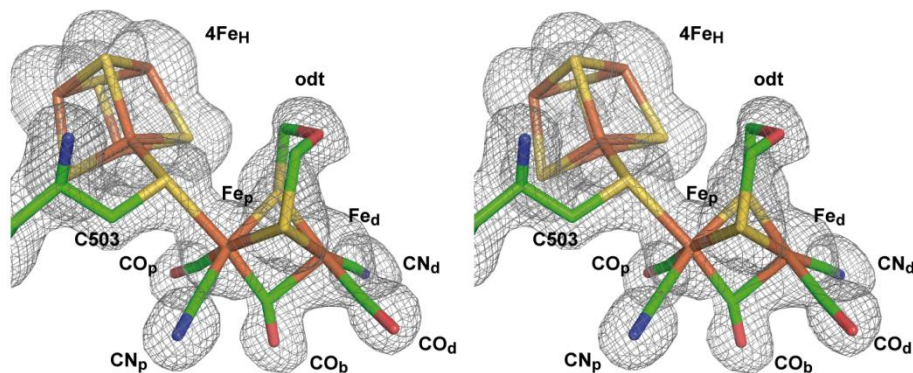**C**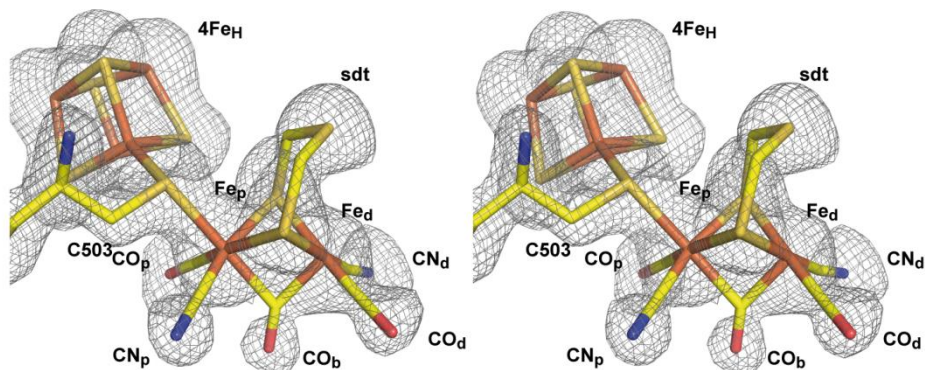

**Figure S6: Stereo view of Figure 6: Models of the H-cluster of non-native Cpl derivatives.** Stick models of (A) Cpl<sup>PDT</sup> (carbon atoms in magenta), (B) Cpl<sup>ODT</sup> (carbon atoms in green) and (C) Cpl<sup>SDT</sup> (carbon atoms in yellow) with F<sub>o</sub>-F<sub>c</sub> simulated annealing omit maps contoured at 3.5 $\sigma$ .

## References

- Lambertz, C.; Chernev, P.; Klingan, K.; Leidel, N.; Sigfridsson, K. G. V.; Happe, T.; Haumann, M. Electronic and Molecular Structures of the Active-Site H-Cluster in [FeFe]-Hydrogenase Determined by Site-Selective X-Ray Spectroscopy and Quantum Chemical Calculations. *Chem. Sci.* **2014**, *5* (3), 1187–1203.
- Li, H.; Rauchfuss, T. B. Iron Carbonyl Sulfides, Formaldehyde, and Amines Condense To Give the Proposed Azadithiolate Cofactor of the Fe-Only Hydrogenases. *J. Am. Chem. Soc.* **2002**, *124* (5), 726–727.
- Lovell, S. C.; Davis, I. W.; Arendall, W. B.; de Bakker, P. I. W.; Word, J. M.; Prisant, M. G.; Richardson, J. S.; Richardson, D. C. Structure Validation by  $\text{C}\alpha$  Geometry:  $\Phi, \psi$  and  $\text{C}\beta$  Deviation. *Proteins Struct. Funct. Bioinforma.* **2003**, *50* (3), 437–450.
- Mulder, D. W.; Boyd, E. S.; Sarma, R.; Lange, R. K.; Endrizzi, J. A.; Broderick, J. B.; Peters, J. W. Stepwise [FeFe]-Hydrogenase H-Cluster Assembly Revealed in the Structure of HydA  $\Delta$ EFG. *Nature* **2010**, *465* (7295), 248–251.
- Pandey, A. S.; Harris, T. V.; Giles, L. J.; Peters, J. W.; Szilagyi, R. K. Dithiomethylether as a Ligand in the Hydrogenase H-Cluster. *J. Am. Chem. Soc.* **2008**, *130* (13), 4533–4540.
- Schmidt, M.; Contakes, S. M.; Rauchfuss, T. B. First Generation Analogues of the Binuclear Site in the Fe-Only Hydrogenases:  $\text{Fe}_2(\mu\text{-SR})_2(\text{CO})_4(\text{CN})_{22}$ . *J. Am. Chem. Soc.* **1999**, *121* (41), 9736–9737.
- Song, L.-C.; Yang, Z.-Y.; Bian, H.-Z.; Hu, Q.-M. Novel Single and Double Diiron Oxadithiolates as Models for the Active Site of [Fe]-Only Hydrogenases. *Organometallics* **2004**, *23* (13), 3082–3084.
- Song, L.-C.; Yang, Z.-Y.; Hua, Y.-J.; Wang, H.-T.; Liu, Y.; Hu, Q.-M. Diiron Thiadithiolates as Active Site Models for the Iron-Only Hydrogenases: Synthesis, Structures, and Catalytic  $\text{H}_2$  Production. *Organometallics* **2007**, *26* (8), 2106–2110.
- Winkler, M.; Esselborn, J.; Happe, T. Molecular Basis of [FeFe]-Hydrogenase Function: An Insight into the Complex Interplay between Protein and Catalytic Cofactor. *Biochim. Biophys. Acta BBA - Bioenerg.* **2013**, *1827* (8–9), 974–985.
